# Supplementary material for: Brachyspira suanatina sp. nov., an enteropathogenic intestinal spirochaete isolated from pigs and mallards: genomic and phenotypic characteristics
Source: PubMed Central journal article supplement (PMC4603578; doi:10.1186/s12866-015-0537-y), 2015-10-12

*B. hyodysenteriae*, WA1

175000 350000 525000 700000 875000 1050000 1225000 1400000 1575000 1750000 1925000 2100000 2275000 2450000 2625000 2800000 2975000

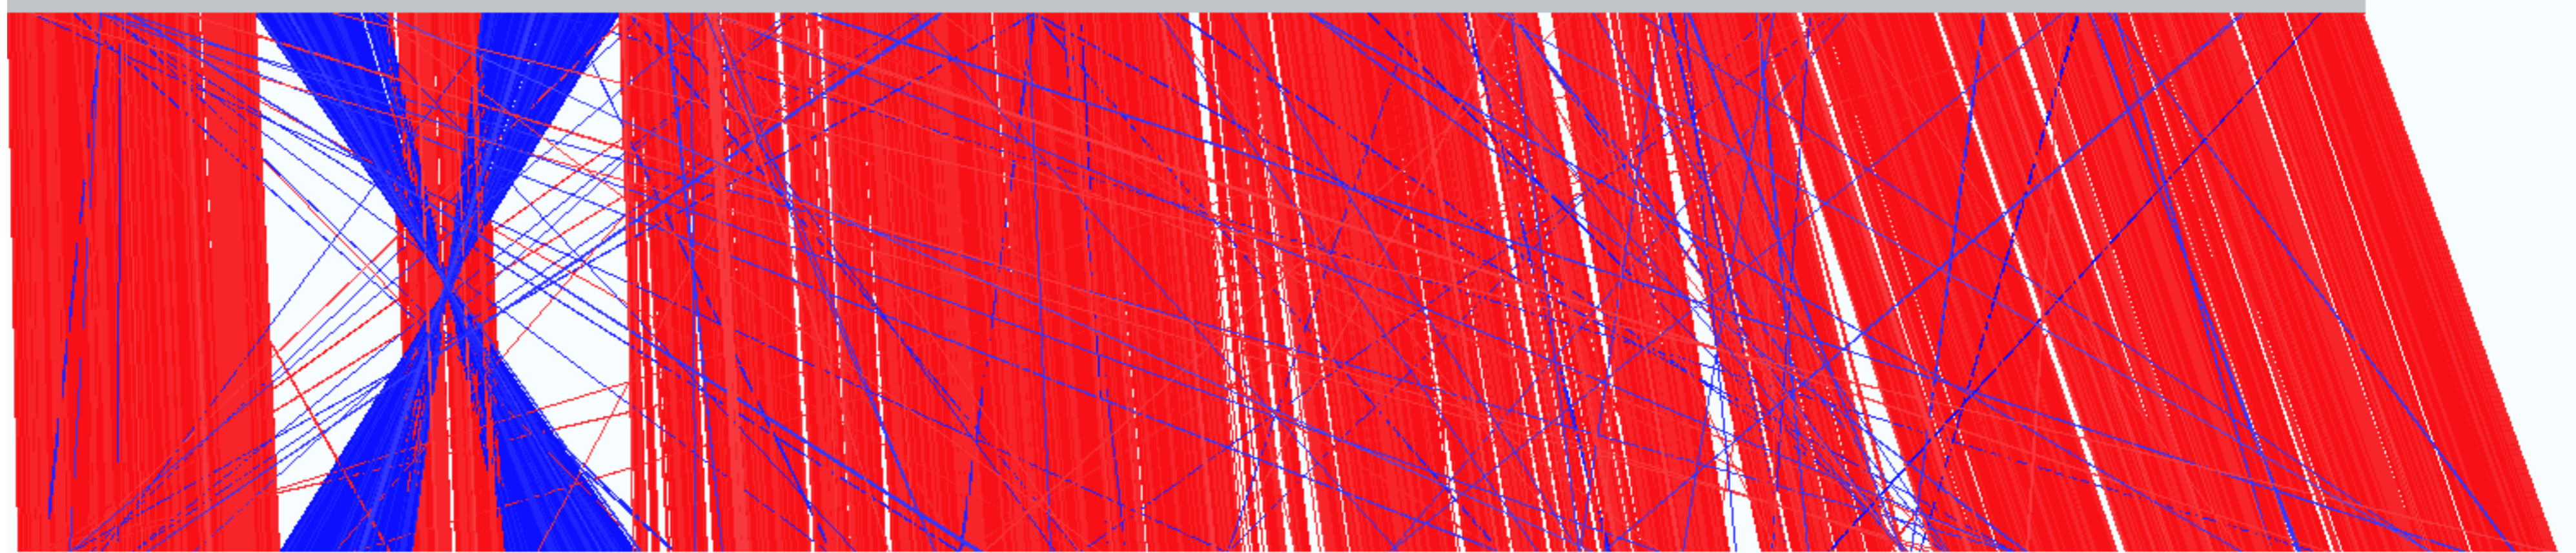

*B. suanatina*, AN4859/03

175000 350000 525000 700000 875000 1050000 1225000 1400000 1575000 1750000 1925000 2100000 2275000 2450000 2625000 2800000 2975000 3150000

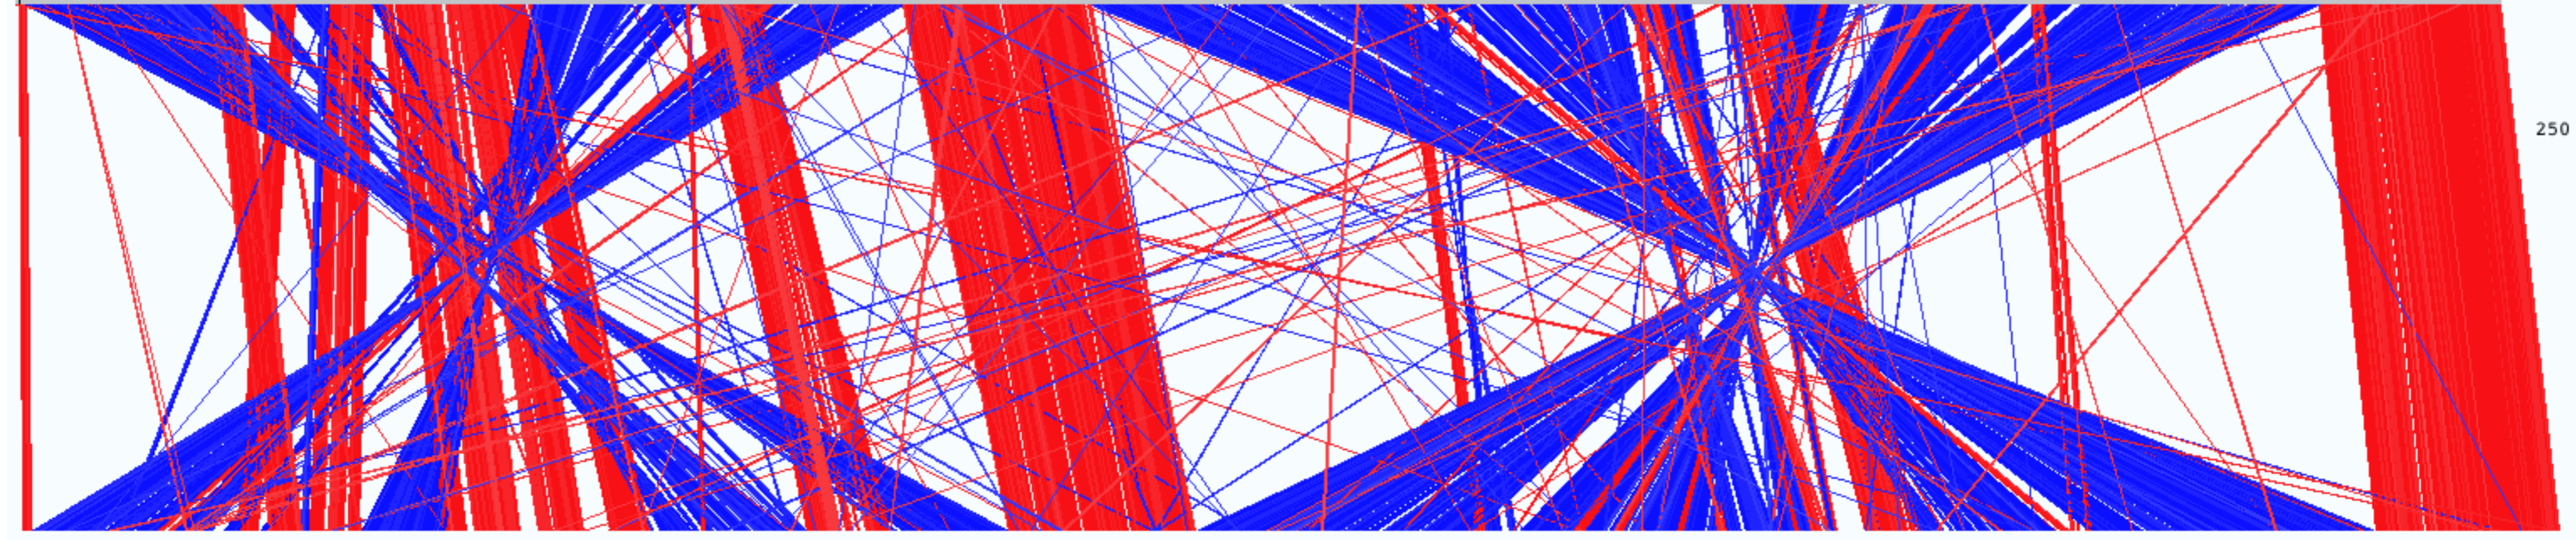

*B. intermedia*, PWS/A<sup>T</sup>

175000 350000 525000 700000 875000 1050000 1225000 1400000 1575000 1750000 1925000 2100000 2275000 2450000 2625000 2800000 2975000 3150000

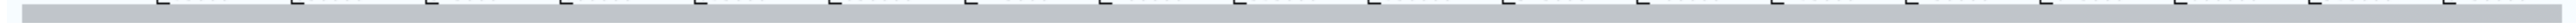

Supplement: 12866_2015_537_MOESM3_ESM.pdf [file 12866_2015_537_MOESM3_ESM.pdf]
